# Supplementary material for: A single-ion single-electron cerrous magnet
Source: Royal Society of Chemistry journal article supplement (doi:10.1039/c9dt03052b), 2019-01-01
Supplement: c9dt03052b1.pdf [file c9dt03052b1.pdf]

*Supporting Information*

**A single-ion single-electron cerrous magnet**

Sandeep K. Gupta,<sup>a</sup> Swaminathan Shanmugan,<sup>a,b</sup> Thayalan Rajeshkumar,<sup>a</sup> Aditya Borah,<sup>a</sup> Marko Damjanović,<sup>c</sup> Michael Schulze,<sup>c</sup> Wolfgang Wernsdorfer,<sup>c</sup> Gopalan Rajaraman\*<sup>a</sup> and Ramaswamy Murugavel\*<sup>a</sup>

<sup>a</sup> Department of Chemistry, Indian Institute of Technology Bombay, Mumbai-400076, India. E-mail: rajaraman@chem.iitb.ac.in, rmv@chem.iitb.ac.in

<sup>b</sup> Department of Chemistry, SRM Institute of Science and Technology, Kattankulathur, Kancheepuram 603203, Tamil Nadu, India

<sup>c</sup> Physikalisches Institut, Karlsruhe Institute of Technology (KIT), Wolfgang-Gaede-Strasse 1, 76131 Karlsruhe; Institute of Nanotechnology, KIT, Hermann-von-Helmholz-Platz 1, 76344, Eggenstein-Leopoldshafen, Germany

**Table S1.** Crystal data and structure refinement details for **1** and **2**.

|                                                  |                                                                                 |                                                                                 |
|--------------------------------------------------|---------------------------------------------------------------------------------|---------------------------------------------------------------------------------|
| Identification code                              | CCDC 1590248                                                                    | CCDC 1877236                                                                    |
| Empirical formula                                | C <sub>30</sub> H <sub>75</sub> CeN <sub>9</sub> O <sub>12</sub> P <sub>3</sub> | C <sub>30</sub> H <sub>75</sub> LaN <sub>9</sub> O <sub>12</sub> P <sub>3</sub> |
| Formula weight                                   | 987.02                                                                          | 985.81                                                                          |
| Temperature                                      | 150(2) K                                                                        | 120(2) K                                                                        |
| Crystal system                                   | Orthorhombic                                                                    | Orthorhombic                                                                    |
| Space group                                      | <i>Pbca</i>                                                                     | <i>Pbca</i>                                                                     |
| a (Å)                                            | 26.230(4)                                                                       | 26.322(10)                                                                      |
| b (Å)                                            | 17.688(2)                                                                       | 17.718(7)                                                                       |
| c (Å)                                            | 43.297(6)                                                                       | 43.481(2)                                                                       |
| Volume (Å <sup>3</sup> )                         | 20088(5)                                                                        | 20278(2)                                                                        |
| Z                                                | 16                                                                              | 16                                                                              |
| Crystal size (mm <sup>3</sup> )                  | 0.37 x 0.06 x 0.02                                                              | 0.28 x 0.04 x 0.02                                                              |
| Reflections collected                            | 86784                                                                           | 80836                                                                           |
| Independent reflections                          | 17326 [R(int) = 0.0351]                                                         | 17541 [R(int) = 0.1187]                                                         |
| Data / restraints / parameters                   | 17326 / 5 / 1081                                                                | 17541 / 26 / 1064                                                               |
| Goodness-of-fit on F <sup>2</sup>                | 1.185                                                                           | 1.388                                                                           |
| Final R indices [ <i>I</i> > 2σ( <i>I</i> )]     | R1 = 0.0409, wR2 = 0.0750                                                       | R1 = 0.1433, wR2 = 0.2423                                                       |
| R indices (all data)                             | R1 = 0.0446, wR2 = 0.0766                                                       | R1 = 0.1581, wR2 = 0.2493                                                       |
| Largest diff. peak and hole (e Å <sup>-3</sup> ) | 0.808 and -0.586                                                                | 0.829 and -1.262                                                                |

**Table S2.** SHAPE measures for seven co-ordinate Ce(III) center in **1**.<sup>1</sup>

| Structure [CeO <sub>9</sub> ]      | Symmetry | Ce1    | Ce2    |
|------------------------------------|----------|--------|--------|
| Muffin                             | $C_s$    | 2.786  | 4.492  |
| Hula-hoop                          | $C_{2v}$ | 7.357  | 6.298  |
| Tridiminished icosahedron J63      | $C_{3v}$ | 12.518 | 10.635 |
| Spherical tricapped trigonal prism | $D_{3h}$ | 4.449  | 5.372  |
| Tricapped trigonal prism J51       | $D_{3h}$ | 4.7    | 5.287  |
| Spherical capped square antiprism  | $C_{4v}$ | 3.385  | 5.058  |
| Capped square antiprism J10        | $C_{4v}$ | 4.224  | 6.006  |
| Spherical-relaxed capped cube      | $C_{4v}$ | 8.06   | 6.206  |
| Capped cube J8                     | $C_{4v}$ | 9.405  | 7.408  |
| Johnson triangular cupola J3       | $C_{3v}$ | 13.299 | 12.536 |
| Heptagonal bipyramid               | $D_{7h}$ | 13.556 | 11.103 |
| Octagonal pyramid                  | $C_{8v}$ | 20.301 | 22.157 |
| Enneagon                           | $D_{9h}$ | 33.133 | 30.777 |

**Table S3.** Selected bond distances (Å) and bond angles (°) in **1**.

|                   |           |                   |           |                   |           |
|-------------------|-----------|-------------------|-----------|-------------------|-----------|
| Ce(1)-O(2)        | 2.356(2)  | Ce(1)-O(7)        | 2.627(2)  | Ce(2)-O(22)       | 2.581(3)  |
| Ce(1)-O(3)        | 2.377(2)  | Ce(1)-O(10)       | 2.632(2)  | Ce(2)-O(19)       | 2.672(3)  |
| Ce(1)-O(1)        | 2.388(2)  | Ce(1)-O(8)        | 2.639(2)  | Ce(2)-O(23)       | 2.618(3)  |
| Ce(1)-O(11)       | 2.598(2)  | Ce(2)-O(6)        | 2.378(2)  | Ce(2)-O(20)       | 2.625(3)  |
| Ce(1)-O(13)       | 2.599(3)  | Ce(2)-O(5)        | 2.379(2)  | Ce(2)-O(16)       | 2.639(3)  |
| Ce(1)-O(14)       | 2.612(2)  | Ce(2)-O(4)        | 2.388(2)  | Ce(2)-O(17)       | 2.657(3)  |
| O(2)-Ce(1)-O(3)   | 83.44(8)  | O(13)-Ce(1)-O(10) | 66.79(8)  | O(11)-Ce(1)-O(10) | 48.62(7)  |
| O(2)-Ce(1)-O(1)   | 87.68(8)  | O(14)-Ce(1)-O(10) | 106.39(8) | O(22)-Ce(2)-O(20) | 86.71(9)  |
| O(3)-Ce(1)-O(1)   | 160.12(8) | O(7)-Ce(1)-O(10)  | 105.02(7) | O(23)-Ce(2)-O(20) | 112.21(8) |
| O(2)-Ce(1)-O(11)  | 150.30(8) | O(2)-Ce(1)-O(8)   | 126.80(8) | O(6)-Ce(2)-O(16)  | 81.55(8)  |
| O(3)-Ce(1)-O(11)  | 120.28(7) | O(3)-Ce(1)-O(8)   | 92.33(7)  | O(5)-Ce(2)-O(16)  | 70.54(8)  |
| O(1)-Ce(1)-O(11)  | 74.53(7)  | O(1)-Ce(1)-O(8)   | 78.83(8)  | O(4)-Ce(2)-O(16)  | 78.74(8)  |
| O(2)-Ce(1)-O(13)  | 98.87(8)  | O(11)-Ce(1)-O(8)  | 73.51(8)  | O(22)-Ce(2)-O(16) | 145.35(9) |
| O(3)-Ce(1)-O(13)  | 80.10(8)  | O(13)-Ce(1)-O(8)  | 132.69(8) | O(23)-Ce(2)-O(16) | 132.77(8) |
| O(1)-Ce(1)-O(13)  | 118.95(8) | O(14)-Ce(1)-O(8)  | 145.20(8) | O(20)-Ce(2)-O(16) | 113.13(9) |
| O(11)-Ce(1)-O(13) | 70.79(8)  | O(7)-Ce(1)-O(8)   | 48.35(7)  | O(6)-Ce(2)-O(17)  | 78.07(8)  |
| O(2)-Ce(1)-O(14)  | 75.54(8)  | O(10)-Ce(1)-O(8)  | 66.44(7)  | O(5)-Ce(2)-O(17)  | 118.21(8) |
| O(3)-Ce(1)-O(14)  | 118.76(8) | O(6)-Ce(2)-O(5)   | 88.72(8)  | O(4)-Ce(2)-O(17)  | 78.23(8)  |
| O(1)-Ce(1)-O(14)  | 75.70(8)  | O(6)-Ce(2)-O(4)   | 155.72(9) | O(22)-Ce(2)-O(17) | 150.13(8) |
| O(11)-Ce(1)-O(14) | 77.10(8)  | O(5)-Ce(2)-O(4)   | 97.87(8)  | O(23)-Ce(2)-O(17) | 154.18(8) |
| O(13)-Ce(1)-O(14) | 48.72(8)  | O(6)-Ce(2)-O(22)  | 79.32(8)  | O(20)-Ce(2)-O(17) | 67.23(9)  |
| O(2)-Ce(1)-O(7)   | 79.35(7)  | O(5)-Ce(2)-O(22)  | 80.38(9)  | O(16)-Ce(2)-O(17) | 47.99(8)  |
| O(3)-Ce(1)-O(7)   | 77.17(8)  | O(4)-Ce(2)-O(22)  | 124.75(8) | O(6)-Ce(2)-O(19)  | 112.01(8) |
| O(1)-Ce(1)-O(7)   | 83.74(8)  | O(6)-Ce(2)-O(23)  | 126.96(8) | O(5)-Ce(2)-O(19)  | 143.30(8) |
| O(11)-Ce(1)-O(7)  | 120.91(7) | O(5)-Ce(2)-O(23)  | 73.27(8)  | O(4)-Ce(2)-O(19)  | 75.80(8)  |
| O(13)-Ce(1)-O(7)  | 157.26(8) | O(4)-Ce(2)-O(23)  | 77.23(8)  | O(22)-Ce(2)-O(19) | 74.60(9)  |
| O(14)-Ce(1)-O(7)  | 147.94(8) | O(22)-Ce(2)-O(23) | 49.08(8)  | O(23)-Ce(2)-O(19) | 70.07(8)  |
| O(2)-Ce(1)-O(10)  | 153.33(8) | O(6)-Ce(2)-O(20)  | 69.66(8)  | O(20)-Ce(2)-O(19) | 47.50(8)  |
| O(3)-Ce(1)-O(10)  | 72.26(7)  | O(5)-Ce(2)-O(20)  | 156.61(8) | O(16)-Ce(2)-O(19) | 139.80(9) |
| O(1)-Ce(1)-O(10)  | 118.81(7) | O(4)-Ce(2)-O(20)  | 105.51(8) | O(17)-Ce(2)-O(19) | 96.19(8)  |

**Table S4.** Hydrogen bonds for **1** [Å and °].

| D-H...A               | d(D-H)   | d(H...A) | d(D...A) | <(DHA) |
|-----------------------|----------|----------|----------|--------|
| N(4)-H(4)...O(21)#3   | 0.78(3)  | 2.24(3)  | 2.994(4) | 160(3) |
| N(10)-H(10)...O(12)#4 | 0.79(4)  | 2.15(4)  | 2.919(4) | 164(4) |
| N(5)-H(5A)...O(15)#1  | 0.845(2) | 2.17(2)  | 2.985(4) | 163(3) |
| N(2)-H(2)...O(9)#5    | 0.848(2) | 2.43(2)  | 3.194(4) | 150(3) |
| N(1)-H(1)...O(8)      | 0.81(4)  | 2.37(4)  | 3.160(4) | 165(3) |
| N(6)-H(6)...O(10)     | 0.78(3)  | 2.18(4)  | 2.905(4) | 156(3) |
| N(13)-H(13)...O(16)   | 0.839(2) | 2.34(3)  | 3.080(4) | 147(3) |
| N(12)-H(12)...O(24)#2 | 0.79(4)  | 2.52(4)  | 3.288(5) | 167(3) |
| N(14)-H(14)...O(17)   | 0.848(2) | 2.24(2)  | 3.057(4) | 162(4) |

Symmetry transformations used to generate equivalent atoms:

#1 -x+1,y-1/2,-z+1/2 #2 -x+1,-y,-z #3 x,-y+1/2,z+1/2  
 #4 -x+1,-y+1,-z #5 -x+1/2,y+1/2,z

**Table S5.** SHAPE measures for seven co-ordinate La(III) center in **2**.<sup>1</sup>

| Structure [CeO <sub>9</sub> ]      | Symmetry        | La1    | La2    |
|------------------------------------|-----------------|--------|--------|
| Muffin                             | C <sub>s</sub>  | 2.877  | 4.492  |
| Hula-hoop                          | C <sub>2v</sub> | 7.196  | 6.228  |
| Tridiminised icosahedron J63       | C <sub>3v</sub> | 12.733 | 10.6   |
| Spherical tricapped trigonal prism | D <sub>3h</sub> | 4.724  | 5.345  |
| Tricapped trigonal prism J51       | D <sub>3h</sub> | 4.933  | 5.367  |
| Spherical capped square antiprism  | C <sub>4v</sub> | 3.535  | 5.077  |
| Capped square antiprism J10        | C <sub>4v</sub> | 4.378  | 6.062  |
| Spherical-relaxed capped cube      | C <sub>4v</sub> | 8.148  | 6.117  |
| Capped cube J8                     | C <sub>4v</sub> | 9.48   | 7.376  |
| Johnson triangular cupola J3       | C <sub>3v</sub> | 13.291 | 12.611 |
| Heptagonal bipyramid               | D <sub>7h</sub> | 13.434 | 11.123 |
| Octagonal pyramid                  | C <sub>8v</sub> | 20.005 | 22.289 |
| Enneagon                           | D <sub>9h</sub> | 33.186 | 30.885 |

**Table S6.** Selected bond distances (Å) and bond angles (°) in **2**.

|                   |           |                   |           |                   |          |
|-------------------|-----------|-------------------|-----------|-------------------|----------|
| La(1)-O(1)        | 2.411(8)  | La(1)-O(14)       | 2.653(10) | La(2)-O(22)       | 2.622(9) |
| La(1)-O(3)        | 2.415(8)  | La(1)-O(10)       | 2.684(9)  | La(2)-O(20)       | 2.627(9) |
| La(1)-O(2)        | 2.418(8)  | La(1)-O(13)       | 2.691(9)  | La(2)-O(23)       | 2.633(9) |
| La(1)-O(7)        | 2.614(10) | La(2)-O(5)        | 2.390(9)  | La(2)-O(19)       | 2.655(9) |
| La(1)-O(11)       | 2.630(10) | La(2)-O(4)        | 2.396(8)  | La(2)-O(17)       | 2.657(9) |
| La(1)-O(8)        | 2.640(9)  | La(2)-O(6)        | 2.409(8)  | La(2)-O(16)       | 2.668(9) |
| O(1)-La(1)-O(3)   | 155.5(3)  | O(7)-La(1)-O(10)  | 75.2(3)   | O(6)-La(2)-O(23)  | 117.6(3) |
| O(1)-La(1)-O(2)   | 88.8(3)   | O(11)-La(1)-O(10) | 47.1(3)   | O(22)-La(2)-O(23) | 48.2(3)  |
| O(3)-La(1)-O(2)   | 97.7(3)   | O(8)-La(1)-O(10)  | 70.4(3)   | O(20)-La(2)-O(23) | 77.6(3)  |
| O(1)-La(1)-O(7)   | 78.8(3)   | O(14)-La(1)-O(10) | 139.7(3)  | O(5)-La(2)-O(19)  | 153.6(3) |
| O(3)-La(1)-O(7)   | 125.6(3)  | O(1)-La(1)-O(13)  | 78.2(3)   | O(4)-La(2)-O(19)  | 118.8(3) |
| O(2)-La(1)-O(7)   | 80.6(3)   | O(3)-La(1)-O(13)  | 77.8(3)   | O(6)-La(2)-O(19)  | 72.5(3)  |
| O(1)-La(1)-O(11)  | 69.7(3)   | O(2)-La(1)-O(13)  | 118.0(3)  | O(22)-La(2)-O(19) | 66.1(3)  |
| O(3)-La(1)-O(11)  | 105.3(3)  | O(7)-La(1)-O(13)  | 149.9(3)  | O(20)-La(2)-O(19) | 48.2(3)  |
| O(2)-La(1)-O(11)  | 157.0(3)  | O(11)-La(1)-O(13) | 67.0(3)   | O(23)-La(2)-O(19) | 106.2(3) |
| O(7)-La(1)-O(11)  | 86.9(3)   | O(8)-La(1)-O(13)  | 154.0(3)  | O(5)-La(2)-O(17)  | 127.0(3) |
| O(1)-La(1)-O(8)   | 126.9(3)  | O(14)-La(1)-O(13) | 48.2(3)   | O(4)-La(2)-O(17)  | 78.6(3)  |
| O(3)-La(1)-O(8)   | 77.5(3)   | O(10)-La(1)-O(13) | 95.7(3)   | O(6)-La(2)-O(17)  | 93.0(3)  |
| O(2)-La(1)-O(8)   | 73.7(3)   | O(5)-La(2)-O(4)   | 87.5(3)   | O(22)-La(2)-O(17) | 131.6(3) |
| O(7)-La(1)-O(8)   | 49.5(3)   | O(5)-La(2)-O(6)   | 83.3(3)   | O(20)-La(2)-O(17) | 73.0(3)  |
| O(11)-La(1)-O(8)  | 112.2(3)  | O(4)-La(2)-O(6)   | 160.1(3)  | O(23)-La(2)-O(17) | 145.5(3) |
| O(1)-La(1)-O(14)  | 81.6(3)   | O(5)-La(2)-O(22)  | 100.1(3)  | O(19)-La(2)-O(17) | 66.2(3)  |
| O(3)-La(1)-O(14)  | 78.5(3)   | O(4)-La(2)-O(22)  | 118.6(3)  | O(5)-La(2)-O(16)  | 79.7(3)  |
| O(2)-La(1)-O(14)  | 70.0(3)   | O(6)-La(2)-O(22)  | 80.5(3)   | O(4)-La(2)-O(16)  | 83.9(3)  |
| O(7)-La(1)-O(14)  | 144.8(3)  | O(5)-La(2)-O(20)  | 150.6(3)  | O(6)-La(2)-O(16)  | 77.2(3)  |
| O(11)-La(1)-O(14) | 113.1(3)  | O(4)-La(2)-O(20)  | 75.0(3)   | O(22)-La(2)-O(16) | 157.6(3) |
| O(8)-La(1)-O(14)  | 132.8(3)  | O(6)-La(2)-O(20)  | 120.1(3)  | O(20)-La(2)-O(16) | 120.5(3) |
| O(1)-La(1)-O(10)  | 111.6(3)  | O(22)-La(2)-O(20) | 69.6(3)   | O(23)-La(2)-O(16) | 148.8(3) |
| O(3)-La(1)-O(10)  | 76.2(3)   | O(5)-La(2)-O(23)  | 75.4(3)   | O(19)-La(2)-O(16) | 104.4(3) |
| O(2)-La(1)-O(10)  | 144.0(3)  | O(4)-La(2)-O(23)  | 76.6(3)   | O(17)-La(2)-O(16) | 48.3(3)  |

**Table S7.** Hydrogen bonds for **2** [ $\text{\AA}$  and  $^\circ$ ].

| D-H...A                | d(D-H)   | d(H...A) | d(D...A)  | $\angle(\text{DHA})$ |
|------------------------|----------|----------|-----------|----------------------|
| N(3)-H(3)...O(9)#1     | 1.06(12) | 2.22(13) | 3.248(15) | 162(10)              |
| N(11)-H(11)...O(18)#3  | 0.88     | 2.44     | 3.163(14) | 139.4                |
| N(14)-H(14)...O(19)    | 0.88     | 2.27     | 2.915(14) | 130.1                |
| N(10)-H(10)...O(17)    | 0.87(2)  | 2.41(13) | 3.147(14) | 143(18)              |
| N(13)-H(13)...O(12)    | 0.87(2)  | 2.21(5)  | 3.005(15) | 151(10)              |
| N(2)-H(2)...O(13)      | 0.99(13) | 2.10(13) | 3.064(14) | 164(10)              |
| N(4)-H(4)...O(14)      | 0.75(16) | 2.36(17) | 3.076(16) | 162(18)              |
| N(15)-H(15A)...O(24)#2 | 0.93(15) | 2.14(15) | 2.993(14) | 152(13)              |
| N(5)-H(5A)...O(21)#2   | 0.88     | 2.35     | 2.918(14) | 122.1                |

Symmetry transformations used to generate equivalent atoms:

#1  $-x+1, -y+2, -z+1$  #2  $-x+1, y-1/2, -z+3/2$  #3  $-x+3/2, y+1/2, z$

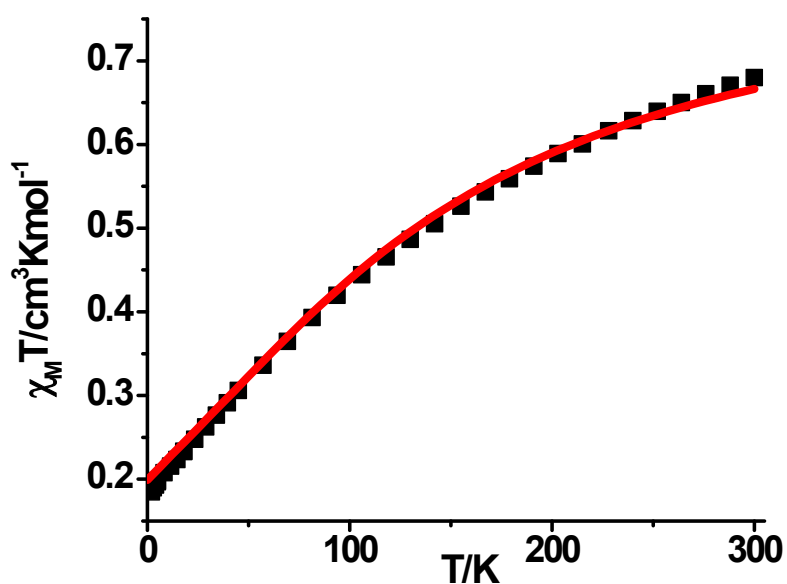

**Figure S1.** Experimental and *ab initio* CASSCF computed temperature dependence of the  $\chi_M T$  product at 1000 Oe for **1**. Black squares correspond to the experimental magnetic susceptibility data for **1**. The solid lines are the computed magnetic susceptibilities. The computed susceptibilities are multiplied by a factor of 0.986.

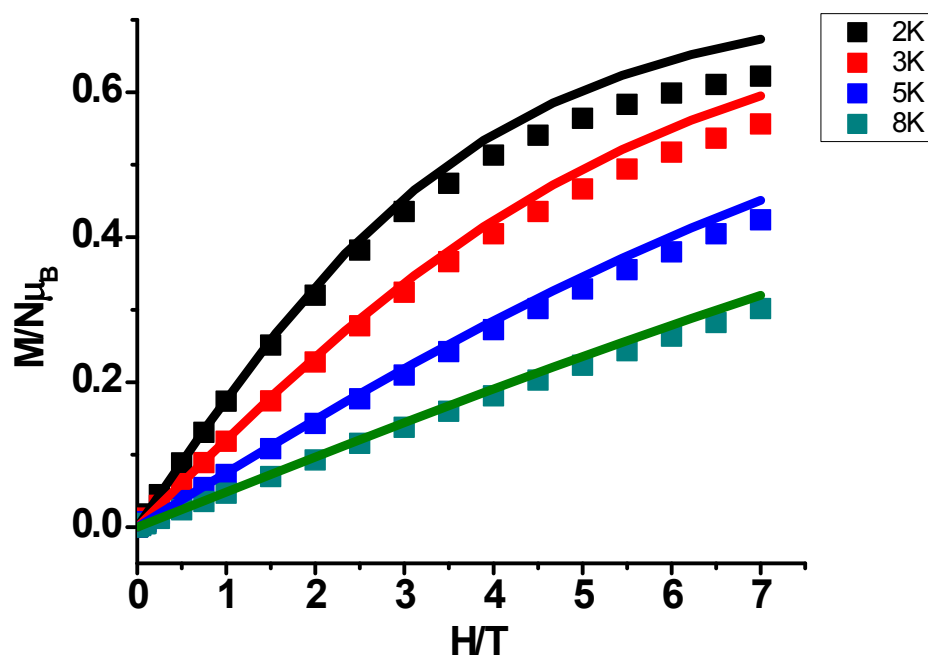

**Figure S2.** The field-dependent magnetization data for **1**. Black squares correspond to the experimental magnetic susceptibility data for **1**. The solid lines are the computed magnetic susceptibilities. The computed susceptibilities are multiplied by a factor of 0.98.

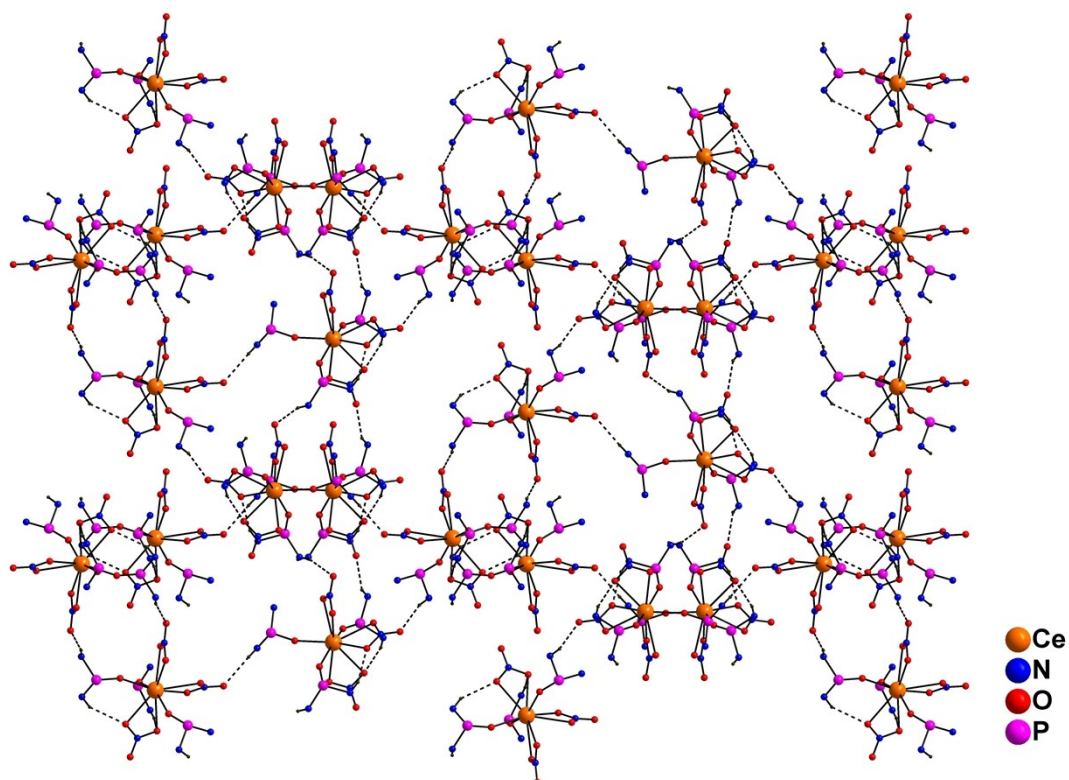

**Figure S3.** H-bonding pattern in complex **1** leading to formation of a network of monomeric cerium(III) complexes.



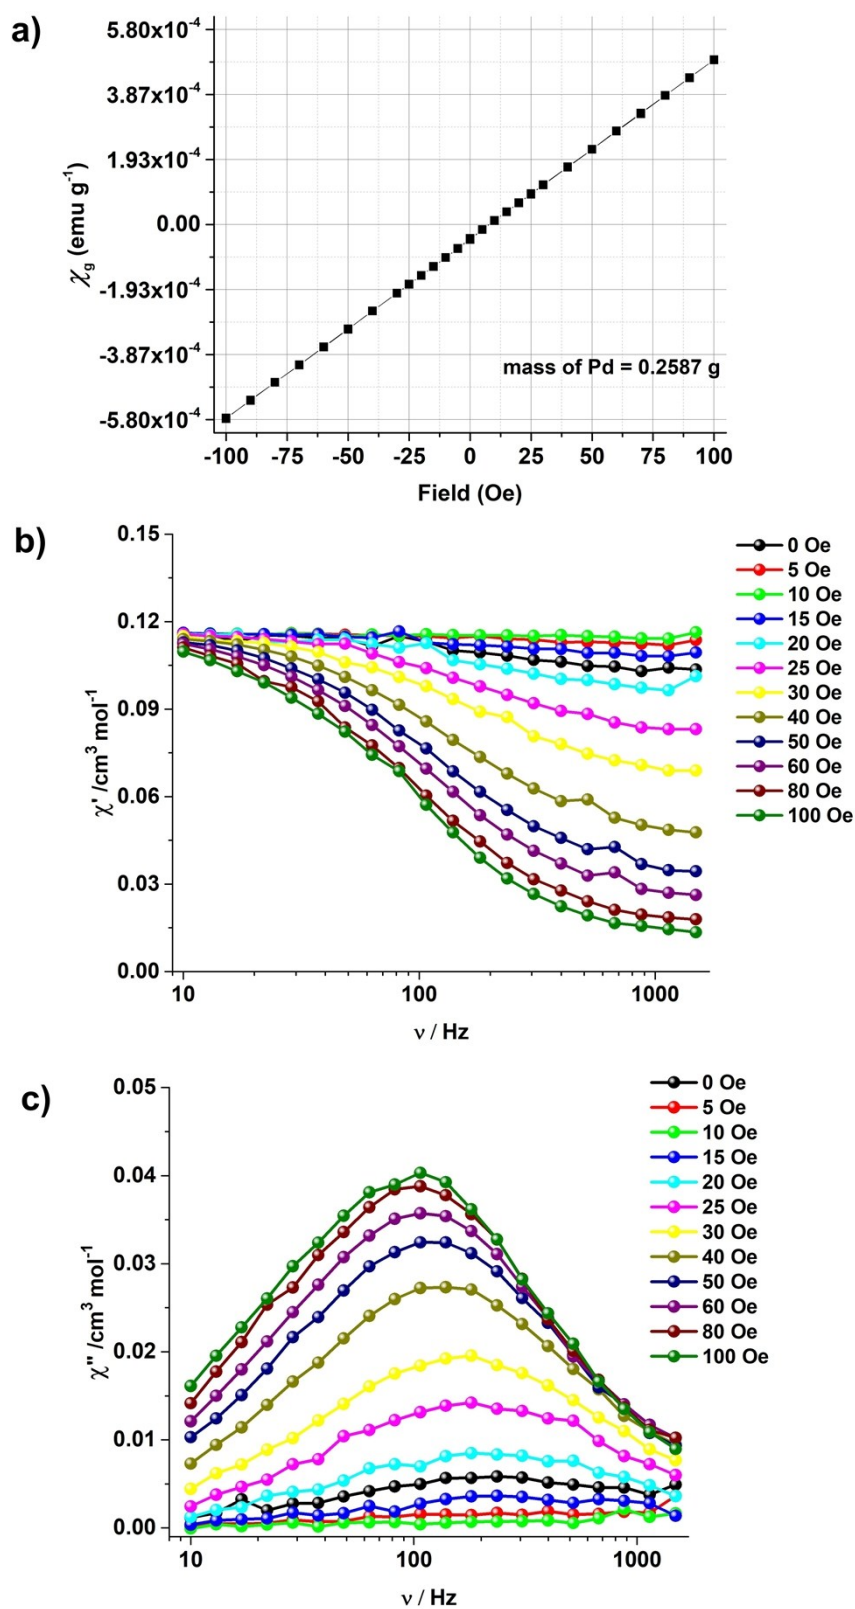

**Figure S4.** (a) Field dependence of the susceptibility of standard Pd sample measured at 298 K in first MPMS indicating a remnant dc field  $\sim 8.5$  Oe. (b) Frequency dependence of the (a) in-phase ( $\chi'_M$ ) component and (b) out-of-phase ( $\chi''_M$ ) component of the ac susceptibility measured in an oscillating ac field of 3.5 Oe under various dc fields for complex **1**.

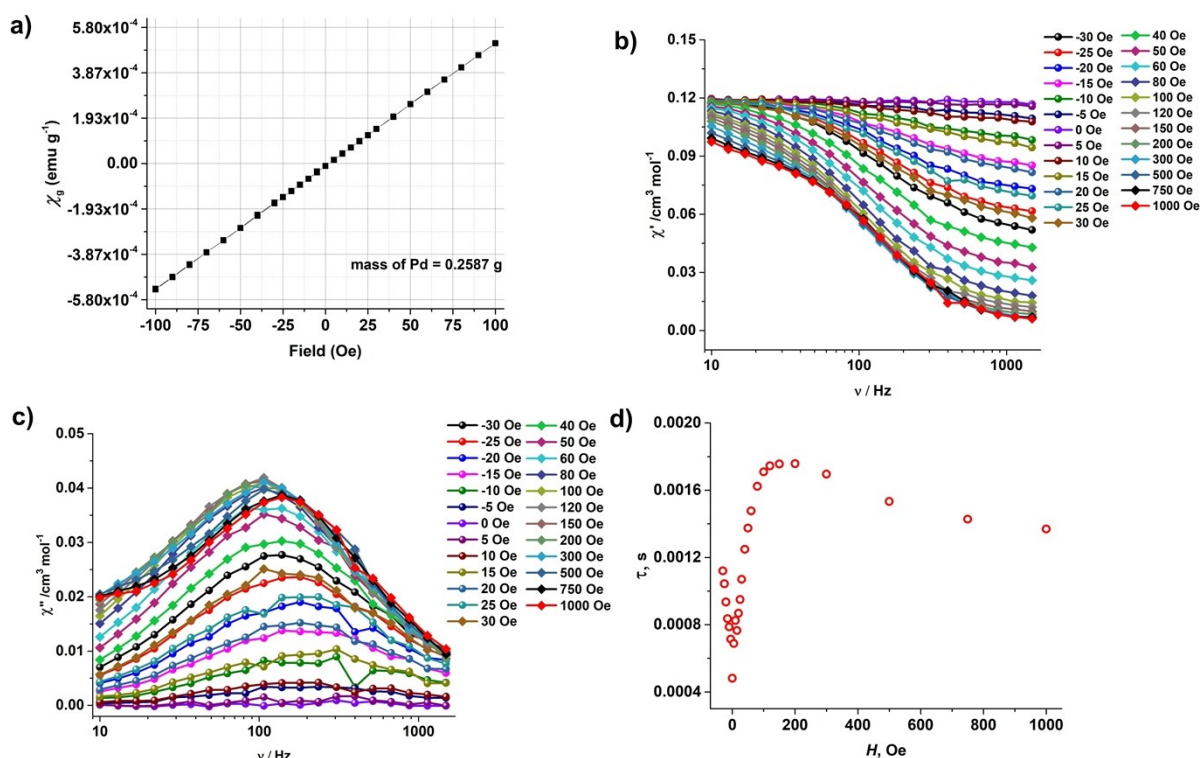

**Figure S5.** (a) Field dependence of the susceptibility of standard Pd sample measured at 298 K in second MPMS indicating a remnant dc field  $\sim 2$  Oe. (b) Frequency dependence of the (a) in-phase ( $\chi_M'$ ) component and (b) out-of-phase ( $\chi_M''$ ) component of the ac susceptibility measured in an oscillating ac field of 3.5 Oe under various dc fields for complex **1**. (d) Field dependence of the relaxation time at various dc fields for complex **1**.

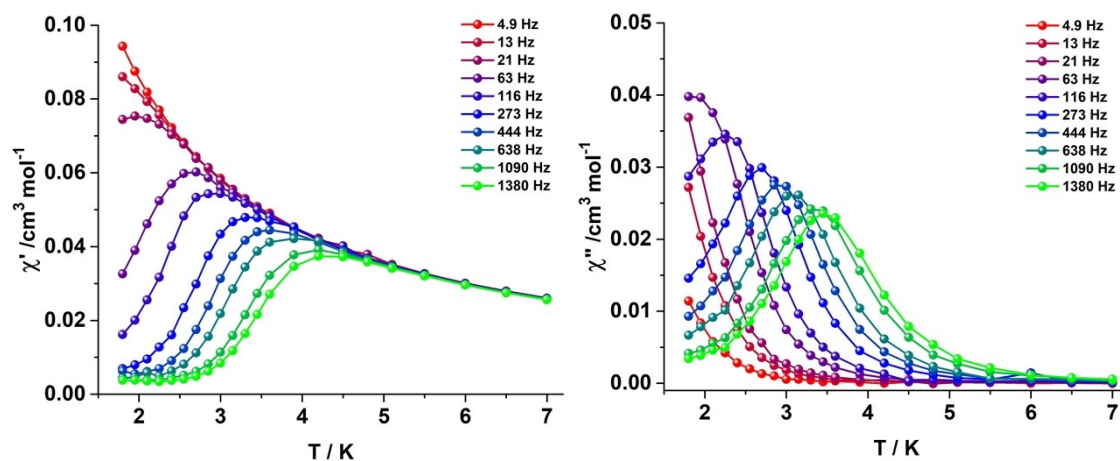

**Figure S6.** Temperature dependence of the (left) in-phase ( $\chi_M'$ ) component and (right) out-of-phase ( $\chi_M''$ ) component of the ac susceptibility measured in an oscillating ac field of 3.5 Oe for complex **1** at various ac frequencies under an applied dc field of 200 Oe.

**Table S8.** Best-fit parameters obtained from the least-square fitting of the frequency dependent ac susceptibility data of complex **1** at an applied dc field of 200 Oe based on generalized Debye model considering one relaxation.

| $T$ (K) | $\chi_s$ (cm <sup>3</sup> mol <sup>-1</sup> ) | $\chi_T$ (cm <sup>3</sup> mol <sup>-1</sup> ) | $\tau$ (s) | $\alpha$ |
|---------|-----------------------------------------------|-----------------------------------------------|------------|----------|
| 1.8     | 3.66E-03                                      | 9.63E-02                                      | 3.90E-03   | 4.23E-02 |
| 1.95    | 3.49E-03                                      | 8.89E-02                                      | 3.01E-03   | 3.56E-02 |
| 2.1     | 3.33E-03                                      | 8.26E-02                                      | 2.28E-03   | 3.04E-02 |
| 2.25    | 3.30E-03                                      | 7.76E-02                                      | 1.76E-03   | 2.27E-02 |
| 2.4     | 3.05E-03                                      | 7.26E-02                                      | 1.27E-03   | 2.24E-02 |
| 2.55    | 2.89E-03                                      | 6.84E-02                                      | 9.17E-04   | 2.04E-02 |
| 2.7     | 2.82E-03                                      | 6.45E-02                                      | 6.59E-04   | 1.48E-02 |
| 2.85    | 2.46E-03                                      | 6.13E-02                                      | 4.76E-04   | 1.78E-02 |
| 3       | 2.37E-03                                      | 5.82E-02                                      | 3.46E-04   | 1.40E-02 |
| 3.15    | 2.28E-03                                      | 5.55E-02                                      | 2.54E-04   | 1.45E-02 |
| 3.3     | 2.02E-03                                      | 5.31E-02                                      | 1.87E-04   | 1.34E-02 |
| 3.45    | 1.51E-03                                      | 5.08E-02                                      | 1.39E-04   | 1.79E-02 |
| 3.6     | 1.13E-03                                      | 4.88E-02                                      | 1.05E-04   | 1.87E-02 |

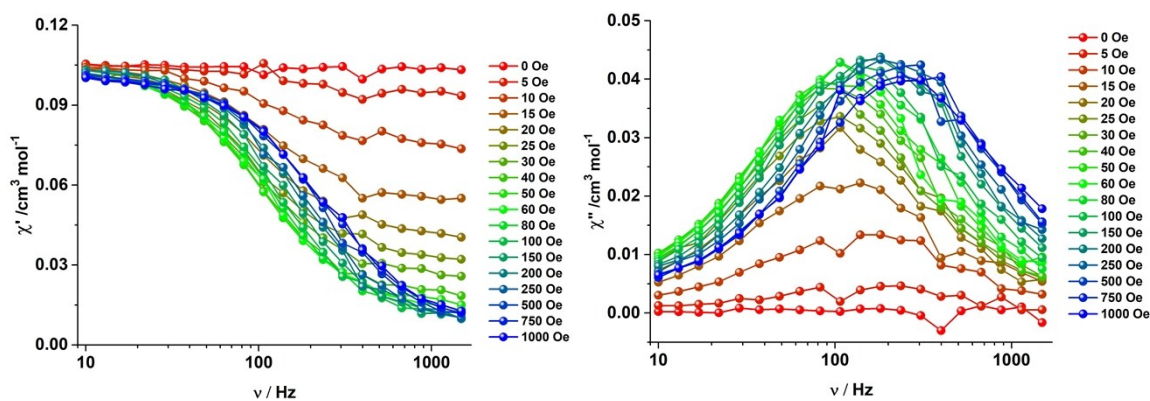

**Figure S7.** Frequency dependence of the (left) in-phase ( $\chi_M'$ ) component and (right) out-of-phase ( $\chi_M''$ ) component of the ac susceptibility measured in an oscillating ac field of 3.5 Oe for complex **1@2** at various dc fields.

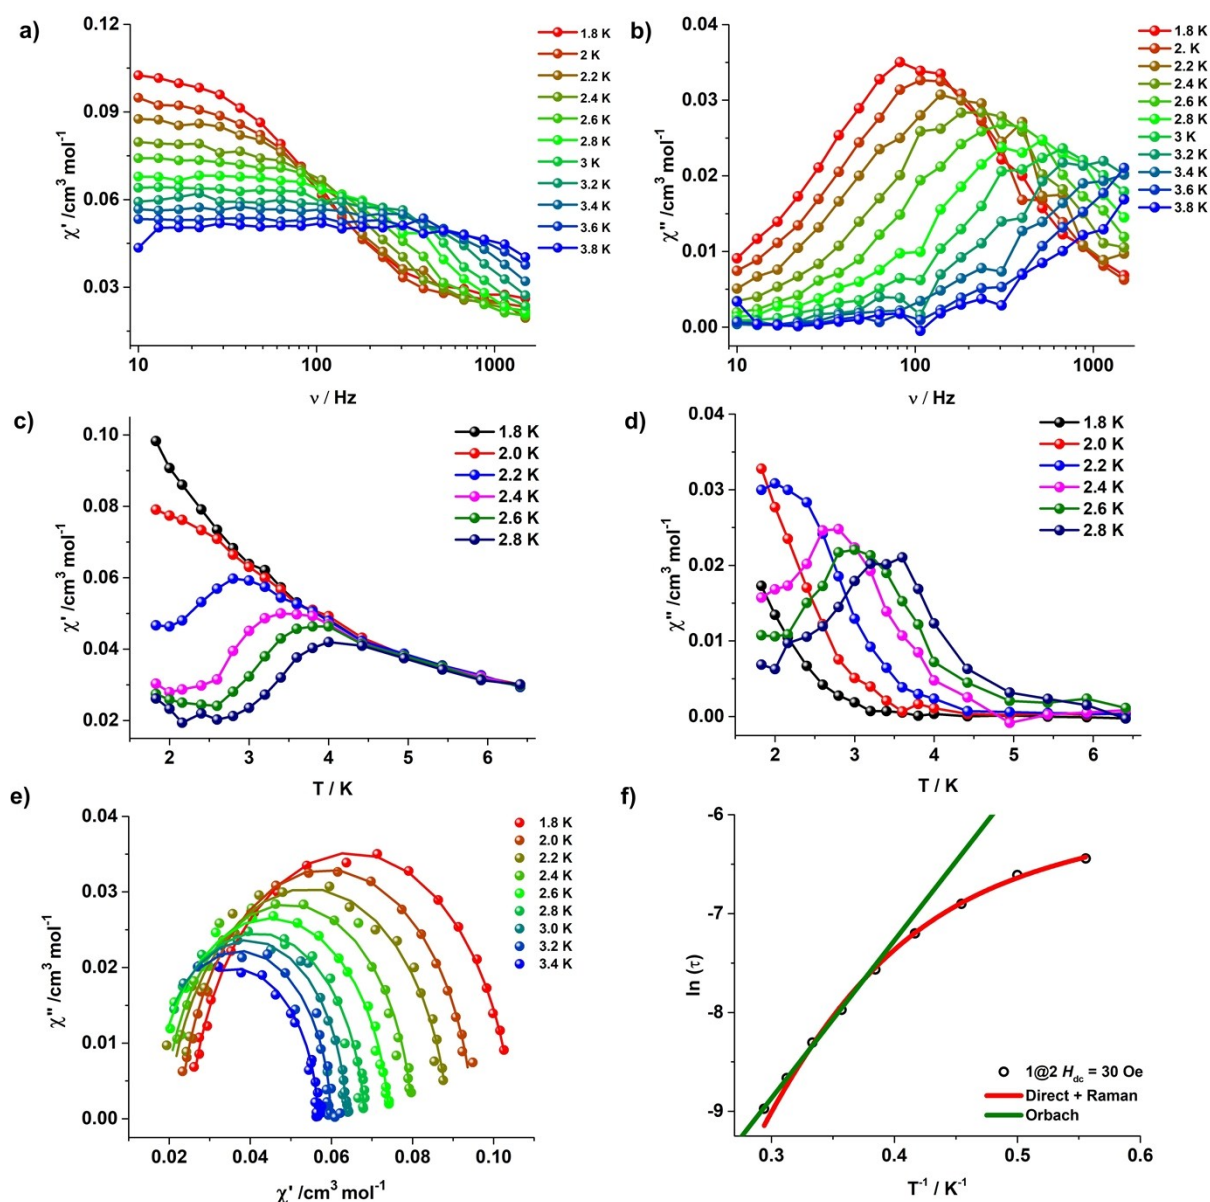

**Figure S8.** Frequency dependence of the (a) in-phase ( $\chi'_M$ ) component and (b) out-of-phase ( $\chi''_M$ ) of the ac susceptibility measured in an oscillating ac field of 3.5 Oe for complex **1@2** at an applied dc field of 30 Oe. Temperature dependence of the (c) in-phase ( $\chi'_M$ ) component and (d) out-of-phase ( $\chi''_M$ ) of the ac susceptibility measured in an oscillating ac field of 3.5 Oe for complex **1@2** at an applied dc field of 30 Oe. (e) Cole–Cole plot for **1@2** under an applied dc field of 30 Oe. Solid black lines are the best fit to the Debye model. (f) Plot of the relaxation time  $\tau$  versus  $T^{-1}$  obtained for **1@2** under an applied dc field of 30 Oe. Solid lines are best fits to the multiple relaxation processes. ( $D = 306.5 \text{ s}^{-1} \text{ K}^{-1}$ ,  $C = 0.80 \text{ s}^{-1} \text{ K}^{-n}$  and  $n = 7.55$ )

**Table S9.** Best-fit parameters obtained from the least-square fitting of the frequency dependent ac susceptibility data of complex **1@2** at an applied dc field of 30 Oe based on generalized Debye model considering one relaxation.

| T (K) | $\chi_s$ (cm <sup>3</sup> mol <sup>-1</sup> ) | $\chi_T$ (cm <sup>3</sup> mol <sup>-1</sup> ) | $\tau$ (s) | $\alpha$ |
|-------|-----------------------------------------------|-----------------------------------------------|------------|----------|
| 1.8   | 2.51E-02                                      | 1.05E-01                                      | 1.59E-03   | 7.87E-02 |
| 2     | 2.28E-02                                      | 9.49E-02                                      | 1.35E-03   | 5.66E-02 |
| 2.2   | 1.97E-02                                      | 8.88E-02                                      | 1.01E-03   | 8.06E-02 |
| 2.4   | 1.88E-02                                      | 7.98E-02                                      | 7.47E-04   | 4.58E-02 |
| 2.6   | 1.59E-02                                      | 7.42E-02                                      | 5.18E-04   | 6.01E-02 |
| 2.8   | 1.50E-02                                      | 6.82E-02                                      | 3.44E-04   | 5.02E-02 |
| 3     | 1.52E-02                                      | 6.36E-02                                      | 2.47E-04   | 1.53E-02 |
| 3.2   | 1.49E-02                                      | 5.98E-02                                      | 1.73E-04   | 6.74E-03 |
| 3.4   | 1.53E-02                                      | 5.67E-02                                      | 1.27E-04   | 2.57E-02 |

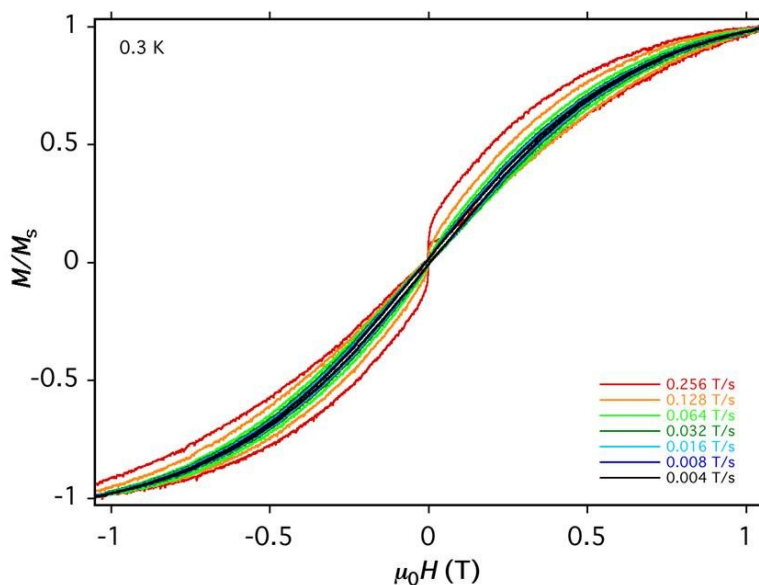

**Figure S9.** Normalized field-dependent magnetization data performed with oriented crystals of **1**, aligned with the transverse field method at 0.3 K with varying field sweep rates.

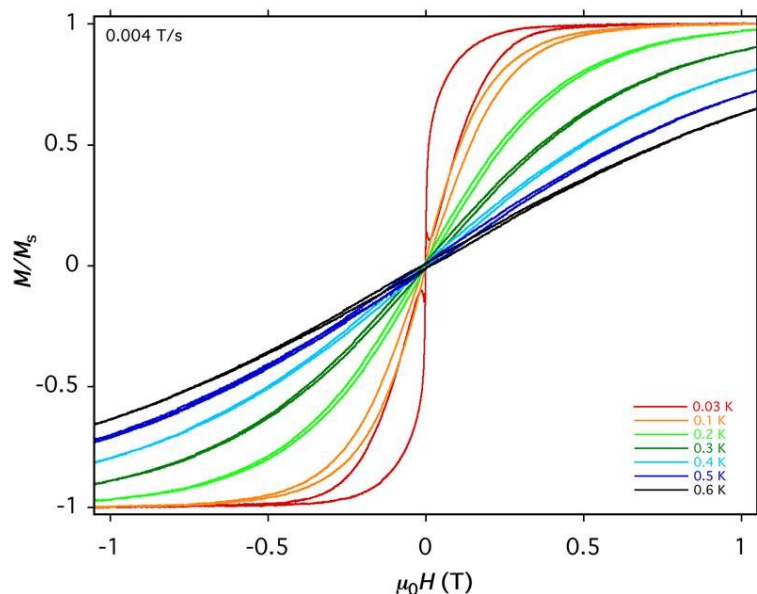

**Figure S10.** Normalized field-dependent magnetization data performed with oriented crystals of **1**, aligned with the transverse field method at varying temperatures with field sweep rates of 0.004 T/s.

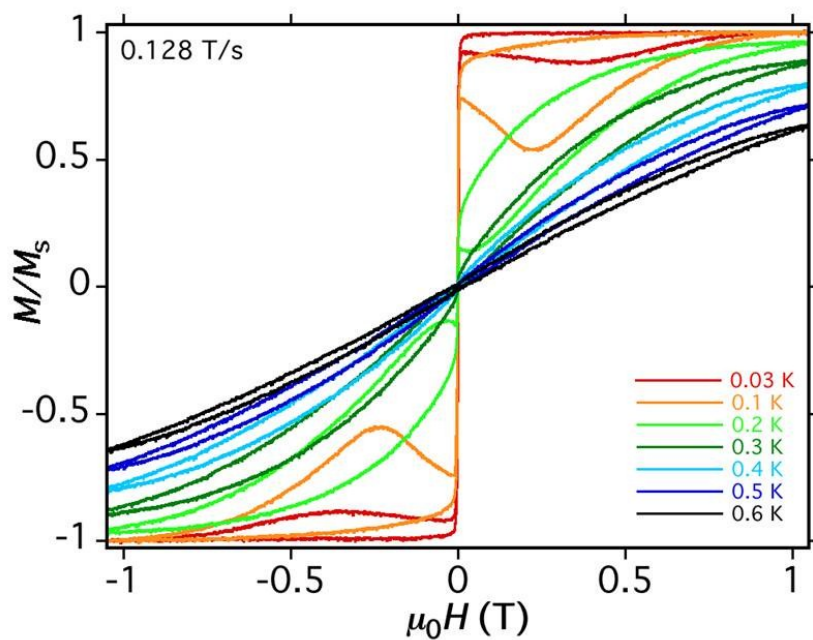

**Figure S11.** Normalized field-dependent magnetization data performed with oriented crystals of **1**, aligned with the transverse field method at varying temperatures with field sweep rates of 0.128 T/s.

**Table S10:** SINGLE\_ANISO computed spectrum,  $g$ -tensors, relative energies and angles ( $q$ ) of the principal anisotropy axes of the first excited states with respect to the ground state, for ground and excited state Kramers doublets.

| Levels    | Energy (cm <sup>-1</sup> ) | $g_{zz}$ | $g_{xx}$ | $g_{yy}$ | Angles between $g_{zz}$ axis |
|-----------|----------------------------|----------|----------|----------|------------------------------|
| <b>1</b>  |                            |          |          |          |                              |
| 1         | 0.000                      | 0.26     | 1.90     | 1.67     | –                            |
| 2         | 0.000                      |          |          |          |                              |
| 3         | 220.13                     | 2.99     | 0.95     | 1.57     | 16.57                        |
| 4         | 220.13                     |          |          |          |                              |
| <b>1'</b> |                            |          |          |          |                              |
| 1         | 0.000                      | 0.01     | 1.98     | 1.68     | –                            |
| 2         | 0.000                      |          |          |          |                              |
| 3         | 220.13                     | 1.16     | 2.35     | 2.02     | 109.11                       |
| 4         | 220.13                     |          |          |          |                              |
| <b>1a</b> |                            |          |          |          |                              |
| 1         | 0.000                      | 4.15     | 0.08     | 0.13     | -                            |
| 2         | 0.000                      |          |          |          |                              |
| 3         | 687.06                     | 2.26     | 0.61     | 0.91     | 4.23                         |
| 4         | 687.06                     |          |          |          |                              |
| <b>1b</b> |                            |          |          |          |                              |
| 1         | 0.000                      | 4.14     | 0.0      | 0.0      | -                            |
| 2         | 0.000                      |          |          |          |                              |
| 3         | 1123.94                    | 2.25     | 0.19     | 0.21     | 0.90                         |
| 4         | 1123.94                    |          |          |          |                              |
| 5         | 2275.62                    | 8.0      | 0.0      | 0.0      | 0.13                         |
| 6         | 2275.62                    |          |          |          |                              |
| 7         | 2394.43                    | 0.46     | 2.73     | 2.17     | 0.21                         |
| 8         | 2394.43                    |          |          |          |                              |

**Table S11:** Composition of wave functions of the ground state of Ce(III) for complex **1** as derived from SINGLE\_ANISO calculations.

| w.f. | $m_j$ | $c_i$     |           | w.f. | $m_j$ | $c_i$     |           |
|------|-------|-----------|-----------|------|-------|-----------|-----------|
|      |       | real      | imag      |      |       | real      | imag      |
| 1    | -5/2  | -0.399727 | -0.283782 | 2    | -5/2  | 0.025256  | 0.01793   |
|      | -3/2  | 0.100134  | -0.129129 |      | -3/2  | -0.067674 | -0.43807  |
|      | -1/2  | 0.01013   | 0.21647   |      | -1/2  | -0.648621 | 0.260517  |
|      | 1/2   | 0.378079  | 0.587907  |      | 1/2   | 0.133572  | -0.170647 |
|      | 3/2   | -0.308775 | 0.31803   |      | 3/2   | -0.006899 | -0.163259 |
|      | 5/2   | -0.030974 | 0         |      | 5/2   | -0.490218 | 0         |
| 3    | -5/2  | -0.810822 | 0.195998  | 4    | -5/2  | 0.000001  | 0         |
|      | -3/2  | -0.005502 | 0.313408  |      | -3/2  | 0.084862  | 0.262004  |
|      | -1/2  | -0.214903 | 0.004294  |      | -1/2  | 0.269028  | -0.107105 |
|      | 1/2   | -0.286662 | -0.040896 |      | 1/2   | -0.209896 | 0.04632   |
|      | 3/2   | 0.020926  | -0.274608 |      | 3/2   | 0.078986  | 0.303342  |
|      | 5/2   | -0.000001 | 0         |      | 5/2   | -0.834175 | 0         |

**Table S12:** CASSCF computed Mulliken charges.

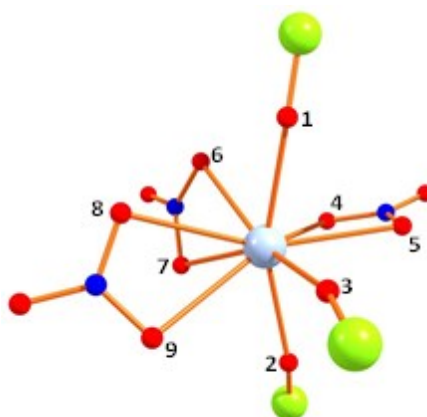

| Atom label | <b>1</b> | <b>1'</b> | <b>1a</b> | <b>1b</b> |
|------------|----------|-----------|-----------|-----------|
| O1         | -1.3205  | -1.3190   | -1.3027   | -1.2749   |
| O2         | -1.3395  | -1.3444   | -1.3245   | -1.2878   |
| O3         | -1.3292  | -1.3166   | -1.3039   | –         |
| O4         | -0.8752  | -0.8867   | –         | –         |
| O5         | -0.8874  | -0.8926   | –         | –         |
| O6         | -0.8694  | -0.8805   | –         | –         |
| O7         | -0.8730  | -0.8734   | –         | –         |
| O8         | -0.8354  | -0.8548   | –         | –         |
| O9         | -0.8938  | -0.8562   | –         | –         |



**Table S13:** Composition of wave functions of the ground state of Ce(III) for complex **1'** as derived from SINGLE\_ANISO calculations.

| w.f. | $m_j$ | $c_i$     |           | w.f. | $m_j$ | $c_i$     |           |
|------|-------|-----------|-----------|------|-------|-----------|-----------|
|      |       | real      | imag      |      |       | real      | imag      |
| 1    | -5/2  | -0.279532 | 0.041097  | 2    | -5/2  | -0.340761 | 0.050099  |
|      | -3/2  | -0.178578 | 0.475703  |      | -3/2  | 0.240624  | -0.341835 |
|      | -1/2  | 0.046462  | 0.3979    |      | -1/2  | -0.323156 | 0.322021  |
|      | 1/2   | -0.366559 | -0.271591 |      | 1/2   | 0.011909  | 0.400426  |
|      | 3/2   | -0.287787 | -0.303199 |      | 3/2   | -0.245873 | -0.444669 |
|      | 5/2   | -0.344424 | 0         |      | 5/2   | 0.282537  | 0         |
| 3    | -5/2  | 0.080709  | -0.734356 | 4    | -5/2  | 0.01034   | -0.094079 |
|      | -3/2  | -0.325287 | 0.168848  |      | -3/2  | 0.093207  | -0.303607 |
|      | -1/2  | 0.12756   | -0.034579 |      | -1/2  | -0.436844 | -0.041994 |
|      | 1/2   | -0.005981 | 0.438817  |      | 1/2   | -0.048308 | 0.123019  |
|      | 3/2   | -0.311972 | 0.059481  |      | 3/2   | -0.203374 | 0.304894  |
|      | 5/2   | 0.094646  | 0         |      | 5/2   | -0.738778 | 0         |

**Table S14:** Composition of wave functions of the ground state of Ce(III) for complex **1a** as derived from SINGLE\_ANISO calculations.

| w.f. | $m_j$ | $c_i$     |           | w.f. | $m_j$ | $c_i$     |           |
|------|-------|-----------|-----------|------|-------|-----------|-----------|
|      |       | real      | imag      |      |       | real      | imag      |
| 1    | -5/2  | 0.719415  | -0.683569 | 2    | -5/2  | 0         | 0         |
|      | -3/2  | -0.010063 | -0.016311 |      | -3/2  | 0.01305   | -0.028737 |
|      | -1/2  | -0.099658 | 0.062178  |      | -1/2  | 0.00256   | 0.002742  |
|      | 1/2   | -0.000033 | -0.003751 |      | 1/2   | 0.115075  | -0.023571 |
|      | 3/2   | -0.029255 | -0.011843 |      | 3/2   | 0.00394   | 0.018756  |
|      | 5/2   | 0         | 0         |      | 5/2   | -0.992383 | 0         |
| 3    | -5/2  | 0.010422  | -0.024406 | 4    | -5/2  | 0.001124  | -0.002633 |
|      | -3/2  | 0.531524  | 0.30637   |      | -3/2  | 0.217754  | 0.740072  |
|      | -1/2  | -0.121759 | -0.048698 |      | -1/2  | 0.040765  | 0.094473  |
|      | 1/2   | -0.070873 | -0.074592 |      | 1/2   | 0.003032  | -0.131101 |
|      | 3/2   | 0.595094  | 0.490904  |      | 3/2   | -0.073012 | -0.609139 |
|      | 5/2   | 0.002863  | 0         |      | 5/2   | -0.026538 | 0         |

**Table S15:** Composition of wave functions of the ground state of Ce(III) for complex **1b** as derived from SINGLE\_ANISO calculations.

| w.f. | $m_j$ | $c_i$     |           | w.f. | $m_j$ | $c_i$     |           |
|------|-------|-----------|-----------|------|-------|-----------|-----------|
|      |       | real      | imag      |      |       | real      | imag      |
| 1    | -5/2  | 0.000148  | -0.001041 | 2    | -5/2  | 0         | 0         |
|      | -3/2  | -0.961719 | -0.227984 |      | -3/2  | 0.028913  | 0.149235  |
|      | -1/2  | 0.001823  | -0.002827 |      | -1/2  | -0.001092 | 0.000035  |
|      | 1/2   | -0.000188 | 0.001076  |      | 1/2   | -0.003055 | 0.001407  |
|      | 3/2   | 0.143688  | 0.049606  |      | 3/2   | 0.090517  | 0.984218  |
|      | 5/2   | 0         | 0         |      | 5/2   | -0.001051 | 0         |
| 3    | -5/2  | -0.000592 | -0.001976 | 4    | -5/2  | 0         | 0         |
|      | -3/2  | 0.003276  | -0.001302 |      | -3/2  | 0.000303  | 0.000029  |
|      | -1/2  | -0.033631 | -0.988143 |      | -1/2  | -0.129429 | -0.075329 |
|      | 1/2   | 0.109279  | 0.102394  |      | 1/2   | -0.95629  | 0.251129  |
|      | 3/2   | 0.000114  | 0.000282  |      | 3/2   | 0.000308  | -0.003512 |
|      | 5/2   | 0         | 0         |      | 5/2   | -0.002063 | 0         |

## References

1. M. Llunell, D. Casanova, J. Cirera, J. Bofill, P. Alemany and S. Alvarez, *SHAPE (version 2.1)*, Barcelona, **2013**.
